# Supplementary material for: Chemometric determination of lipidic parameters in serum using ATR measurements of dry films of solvent extracts
Source: Royal Society of Chemistry journal article supplement (doi:10.1039/c3an01057k), 2013-10-25
Supplement: c3an01057k.pdf [file c3an01057k.pdf]

**SM1.** ATR-FTIR Spectra of dried extracts of the same sample obtained using the four solvents and mixtures assayed in the preliminary study: hexane (green), Folch reagent (black), hexane-isopropanol (red) and ethyl acetate-ethanol (blue). Horizontal magenta lines indicate the regions related to the absorption bands of the chemical bonds (See the text for additional information). NOTE: Spectra were shifted for clarifying.

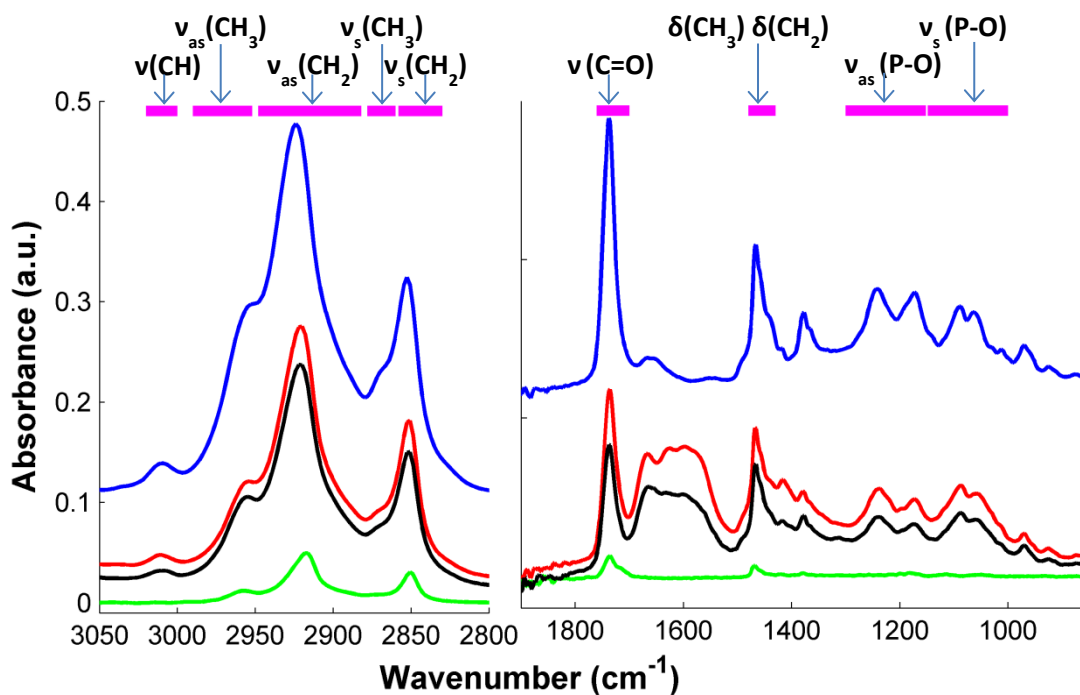

**SM2:** Characteristics of solvents employed to extract the lipidic fraction of serum samples.

| <u>Solvent</u>       | <u>Hazard statement</u>                                                                                                                                                                                                                                                                                                                                        |
|----------------------|----------------------------------------------------------------------------------------------------------------------------------------------------------------------------------------------------------------------------------------------------------------------------------------------------------------------------------------------------------------|
| <b>Chloroform</b>    | H302: Harmful if swallowed.<br>H315: Causes skin irritation.<br>H351: Suspected of causing cancer.<br>H373: May cause damage to organs through prolonged or repeated exposure.                                                                                                                                                                                 |
| <b>Methanol</b>      | H225: Highly flammable liquid and vapour.<br>H301 + H311 + H331: Toxic if swallowed, in contact with skin or if inhaled<br>H370: Causes damage to organs                                                                                                                                                                                                       |
| <b>Hexane</b>        | H225: Highly flammable liquid and vapour.<br>H304: May be fatal if swallowed and enters airways.<br>H315: Causes skin irritation.<br>H336: May cause drowsiness or dizziness.<br>H361f: Suspected of damaging fertility.<br>H373: May cause damage to organs through prolonged or repeated exposure.<br>H411: Toxic to aquatic life with long lasting effects. |
| <b>Isopropanol</b>   | H225: Highly flammable liquid and vapour.<br>H319: Causes serious eye irritation.<br>H336: May cause drowsiness or dizziness.                                                                                                                                                                                                                                  |
| <b>Ethyl Acetate</b> | H225: Highly flammable liquid and vapour.<br>H319: Causes serious eye irritation.<br>H336: May cause drowsiness or dizziness.<br>EUH066: Repeated exposure may cause skin dryness or cracking.                                                                                                                                                                 |
| <b>Ethanol</b>       | H225: Highly flammable liquid and vapour.                                                                                                                                                                                                                                                                                                                      |

**SM3** Full resolution microscopy image of the deposition of 2  $\mu\text{L}$  of sample diluted with water 1:10 and confined in a 4 mm diameter steel ring.

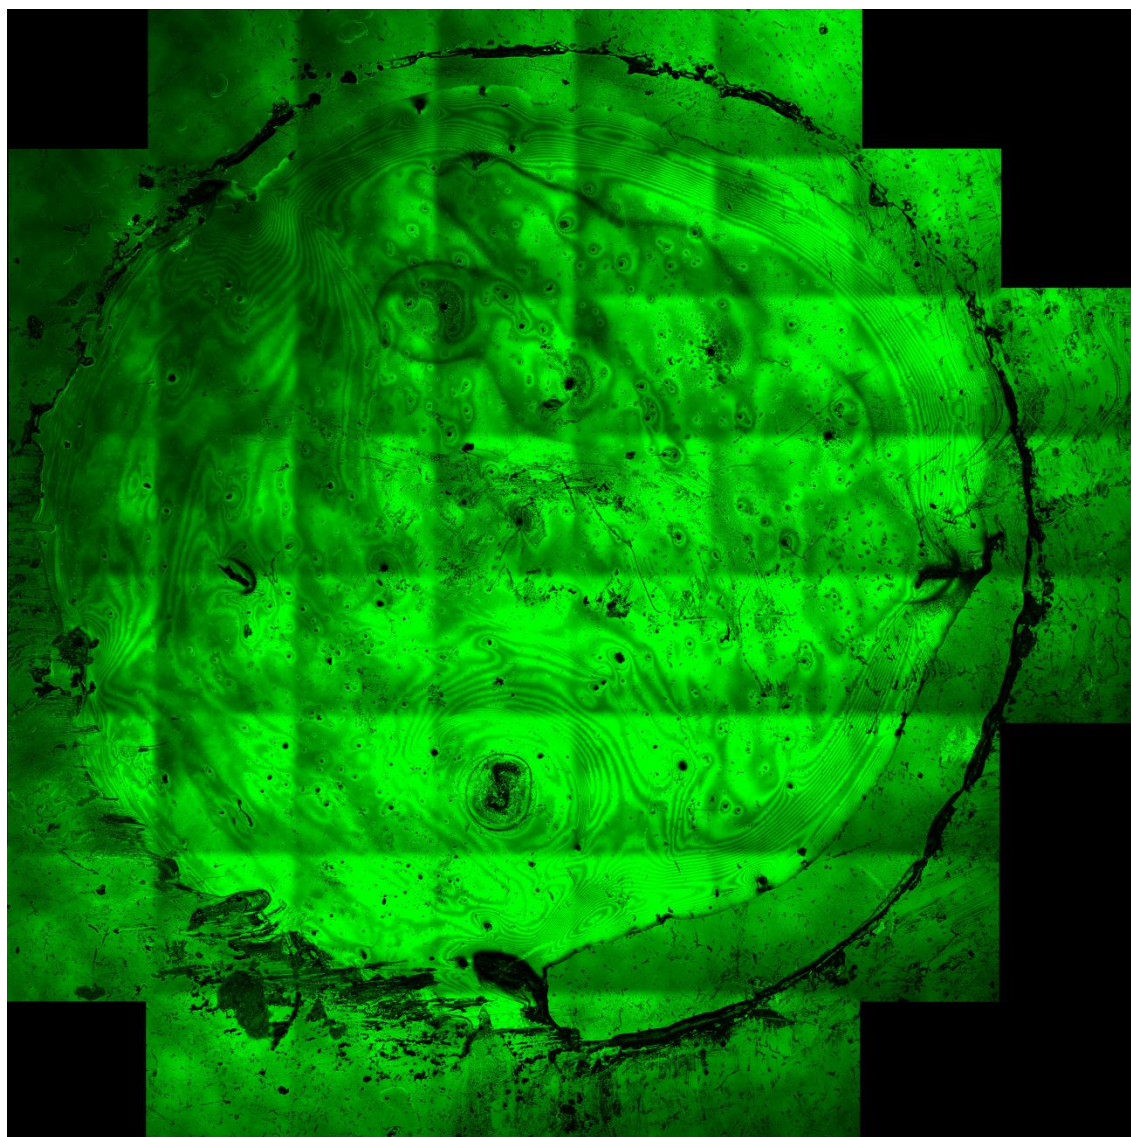



**SM4** Full resolution microscopy image of the deposition of 2  $\mu\text{L}$  of ethyl acetate-ethanol extract of the sample confined in a 4 mm diameter steel ring.

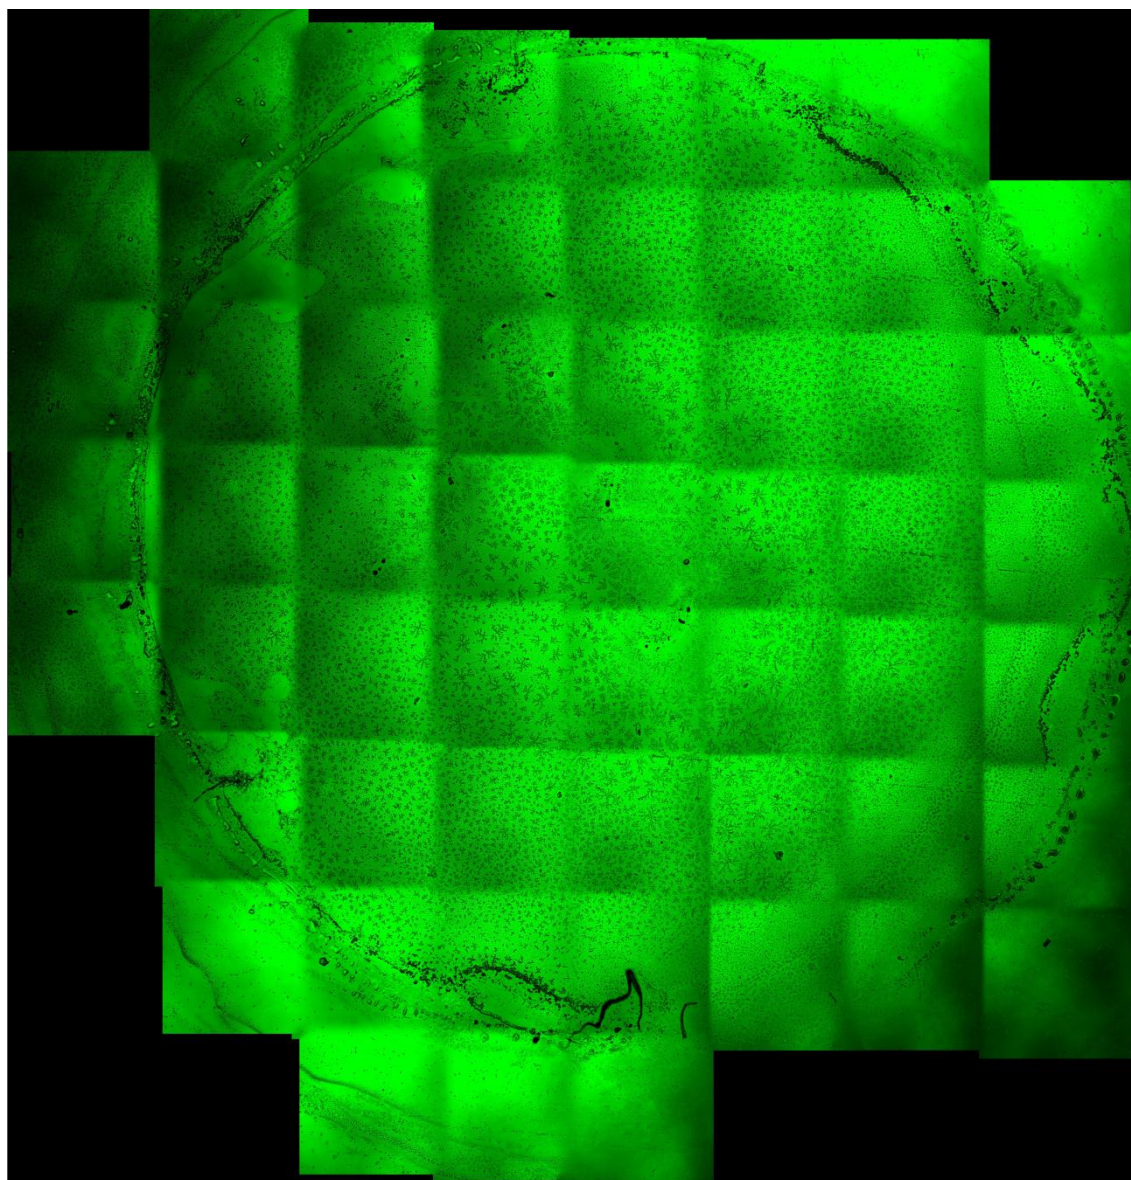



**SM5** Full resolution microscopy image of the deposition of 2  $\mu$ L of hexane-isopropanol extract of the sample confined in a 4 mm diameter steel ring.

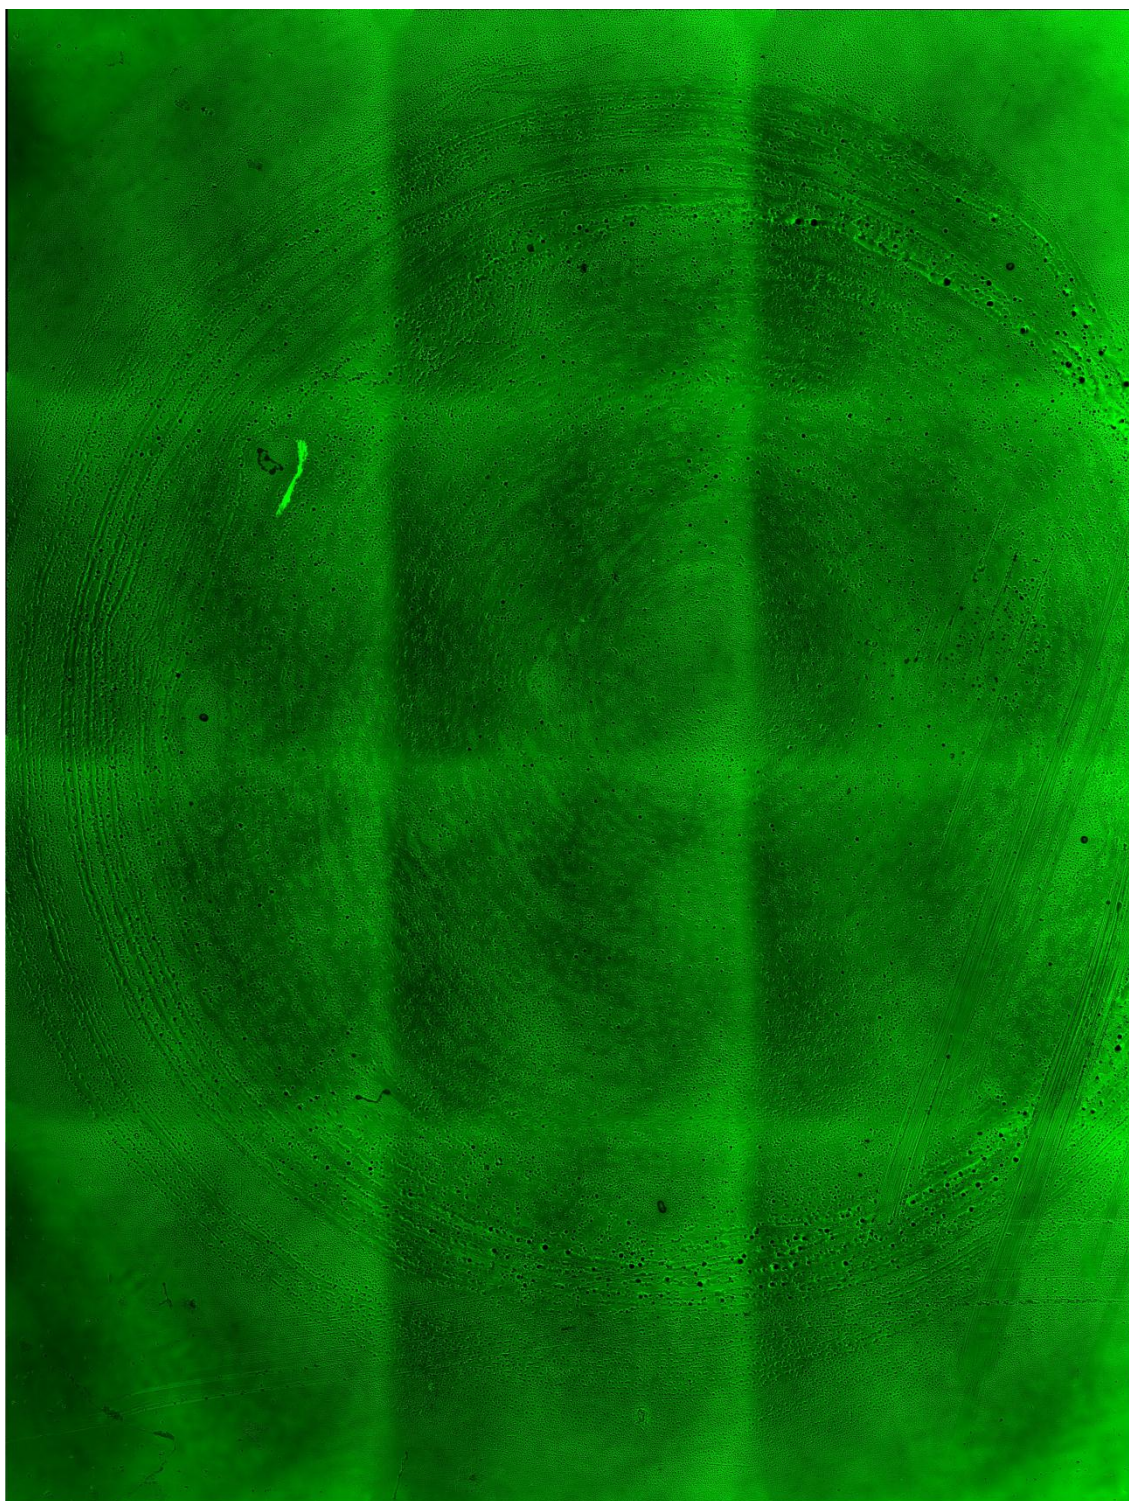

**SM6. Comparison of calibration parameters used and results obtained by different methodologies for the determination of lipidic parameters in serum and blood using FTIR.**

| <i>Analyte</i> | <i>Study</i>          | <i>Samples calibration</i> | <i>Samples validation</i> | <i>RMSEP (mg/dL)</i> | <i>RRMSEP (%)</i> | <i>LV</i> |
|----------------|-----------------------|----------------------------|---------------------------|----------------------|-------------------|-----------|
| Triglycerides  | Hosafci et al         | 283                        | 30                        | 23.6                 | Not Reported      | 11        |
|                | Liu et al.            | 60                         | 30                        | 31.1                 | Not reported      | 7         |
|                | Proposed <sup>1</sup> | 37-28                      | 26-21                     | 18.5-23.0            | 16.9-12.1         | 6-4       |
| Cholesterol    | Hosafci               | 261                        | 25                        | 17.9                 | Not reported      | 16        |
|                | Liu et al.            | 60                         | 30                        | 14.7                 | Not reported      | 10        |
|                | Proposed <sup>1</sup> | 28-38                      | 21-27                     | 9.3-14.6             | 6.6-9.5           | 5         |
| HDL            | Liu et al.            | 60                         | 30                        | 12.0                 | Not reported      | 6         |
|                | Proposed <sup>1</sup> | 28-32                      | 21-24                     | 6.6-6.6              | 19.2-20.2         | 4         |
| LDL            | Liu et al.            | 60                         | 30                        | 13.5                 | Not reported      | 8         |
|                | Proposed <sup>1</sup> | 24-32                      | 21-24                     | 17.1-15.8            | 20.9-18.4         | 4         |

<sup>1</sup>Hexane/Isopropanol (3:1)-Ethyl Acetate/Ethanol (3:1)

**Note:** RMSEP – Root Mean Square Error of Prediction; RRMSEP – Relative Root Mean Square Error of Prediction
